# Supplementary material for: Citric acid-induced room temperature self-healing polysiloxane elastomers with tunable mechanical properties and untraditional AIE fluorescence
Source: Royal Society of Chemistry journal article supplement (doi:10.1039/d2py00789d), 2022-01-01
Supplement: d2py00789d1.pdf [file d2py00789d1.pdf]

## SUPPORTING INFORMATIONS

### **Citric Acid Induced Self-healing Polysiloxane Elastomers with Tunable Mechanical Property and Untraditional AIE Fluorescence**

*Jing-Han Gao,<sup>a</sup> Baoquan Wan,<sup>a</sup> Ming-Sheng Zheng<sup>a</sup> and Jun-Wei Zha<sup>\*a, b, c</sup>*

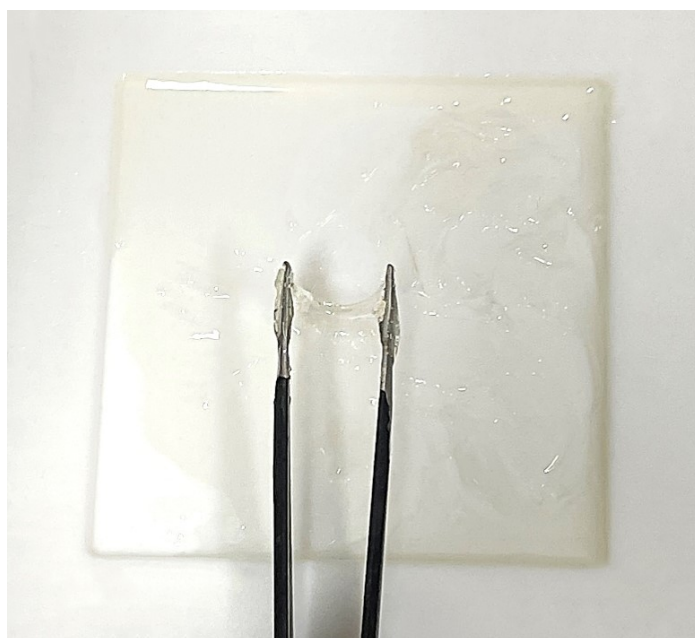

**Fig. S1.** Photo of viscous CA-PDMS.

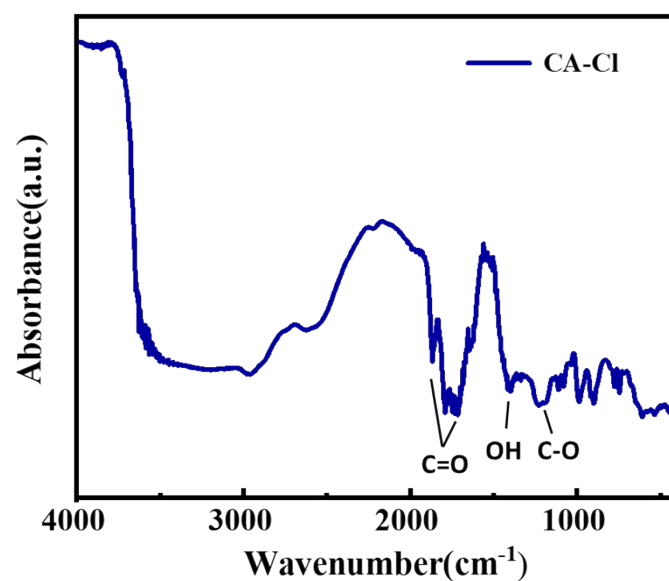

**Fig. S2.** FTIR spectra of citric acid chloride (CA-Cl). The absorption bands of 1877  $\text{cm}^{-1}$ , 1790  $\text{cm}^{-1}$  and 1714  $\text{cm}^{-1}$  are attributed to the C=O stretching vibration of the molecule. The characteristic peaks in 1401  $\text{cm}^{-1}$  and 1231  $\text{cm}^{-1}$  belong to the in-plane vibration of OH and stretching vibration of C-O, respectively.

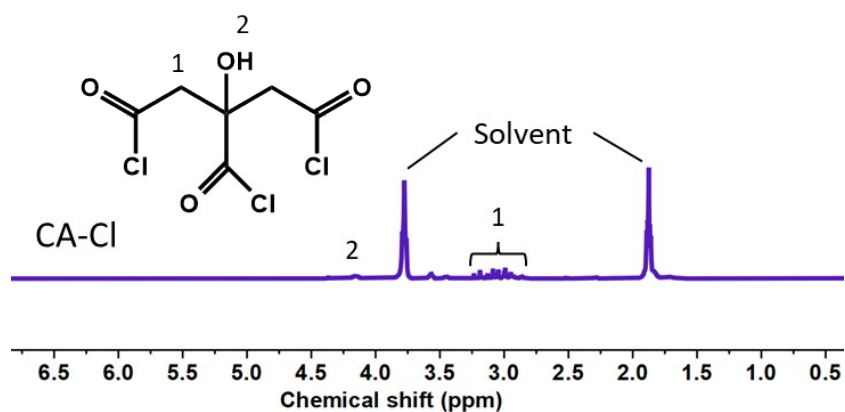

**Fig. S3.**  $^1\text{H}$  NMR spectra of citric CA-Cl.

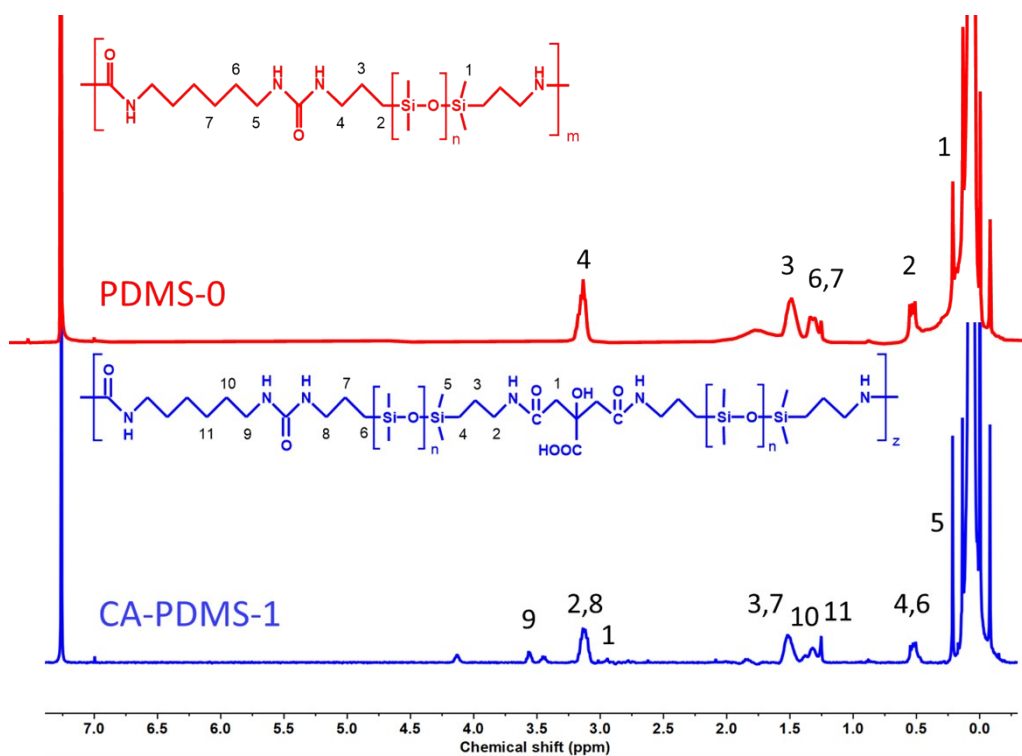

**Fig. S4.** <sup>1</sup>H NMR spectra of PDMS-0 and CA-PDMS-1.

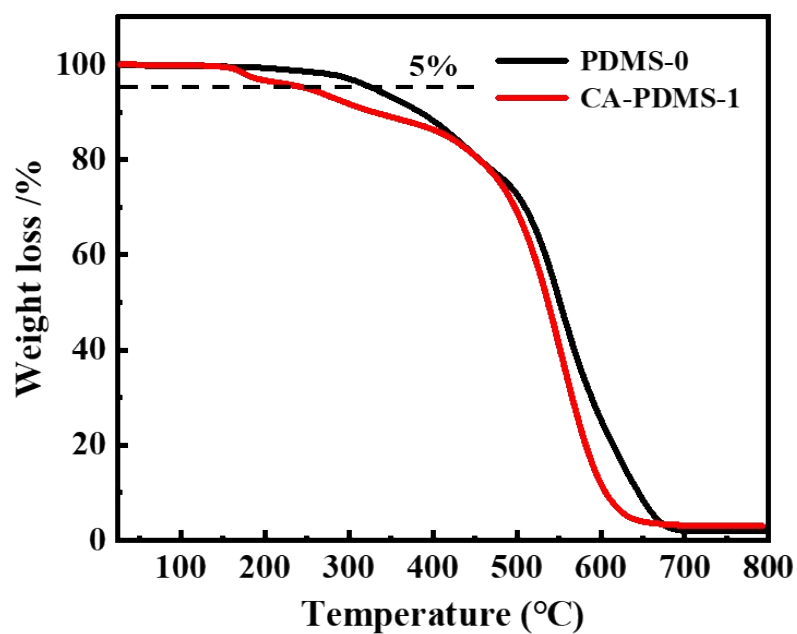

**Fig. S5.** TGA curves of PDMS-0 and CA-PDMS-1.

**Table S1.** Table of mechanical properties of elastomers.

|                  | Elongation at break (%) | Tensile strength (kPa) | Young's modulus (MPa) |
|------------------|-------------------------|------------------------|-----------------------|
| <b>PDMS-0</b>    | 881.26±7.62             | 437.18±15.44           | 0.331±0.066           |
| <b>CA-PDMS-1</b> | 635.57±3.35             | 762.01±29.57           | 1.549±0.242           |
| <b>CA-PDMS-2</b> | 770.73±6.23             | 603.28±37.78           | 1.042±0.102           |
| <b>CA-PDMS-3</b> | 1076.33±9.58            | 305.16±20.10           | 0.303±0.125           |

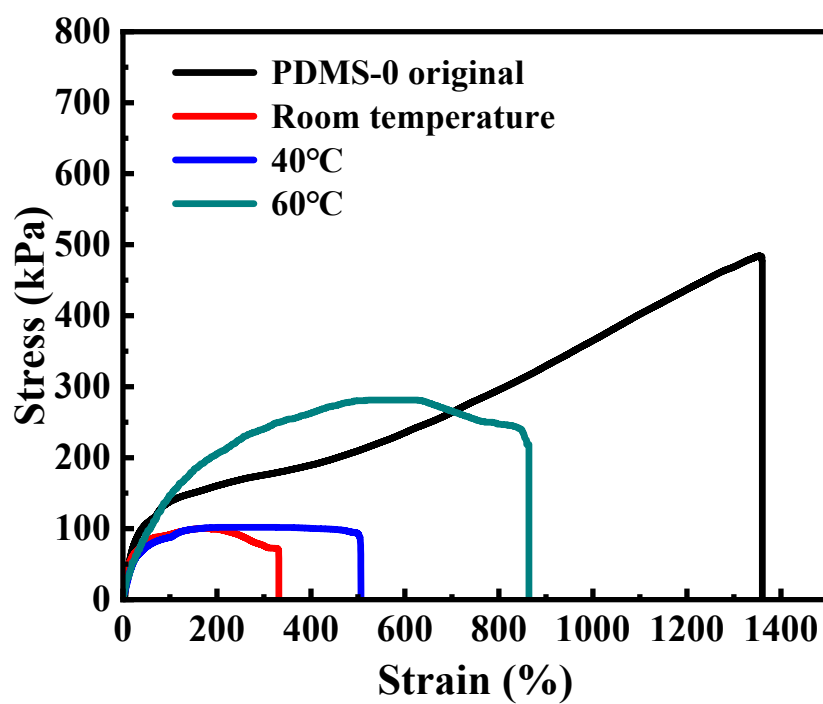

**Fig. S6.** Stress-strain curves of PDMS-0 sample before and after self-healing at room temperature, 40 °C and 60 °C for 8 h.

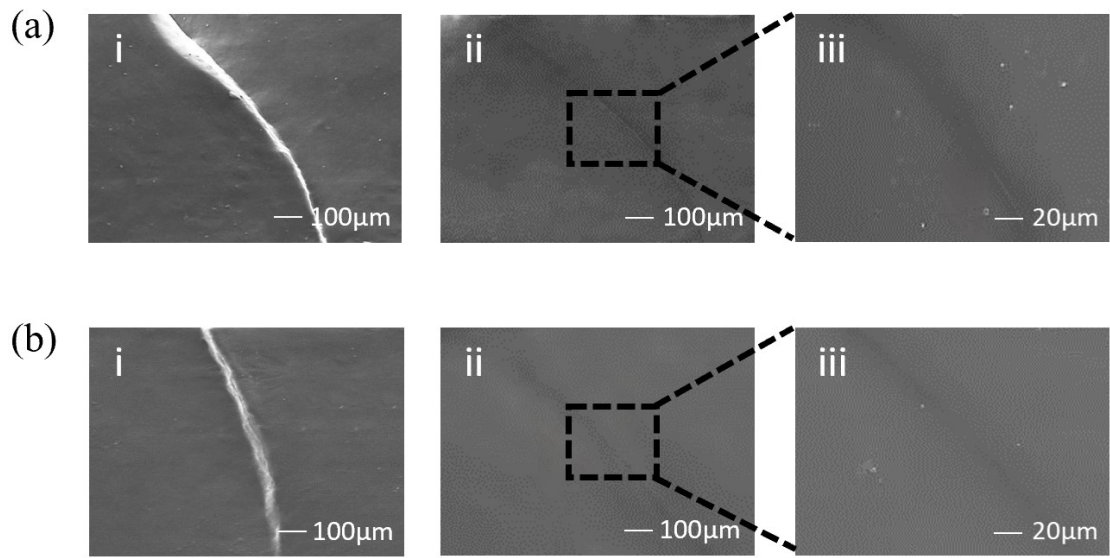

**Fig. S7.** Longitudinal section SEM images of (a) CA-PDMS-1 and (b) CA-PDMS-2 before and after healing 8 h at room temperature.
